# Supplementary material for: Improving microalgal growth by strengthening the flashing light effect simulated with computational fluid dynamics in a panel bioreactor with horizontal baffles
Source: Royal Society of Chemistry journal article supplement (doi:10.1039/c8ra02863j), 2018-01-01
Supplement: c8ra02863j1.pdf [file c8ra02863j1.pdf]

## Support Materials

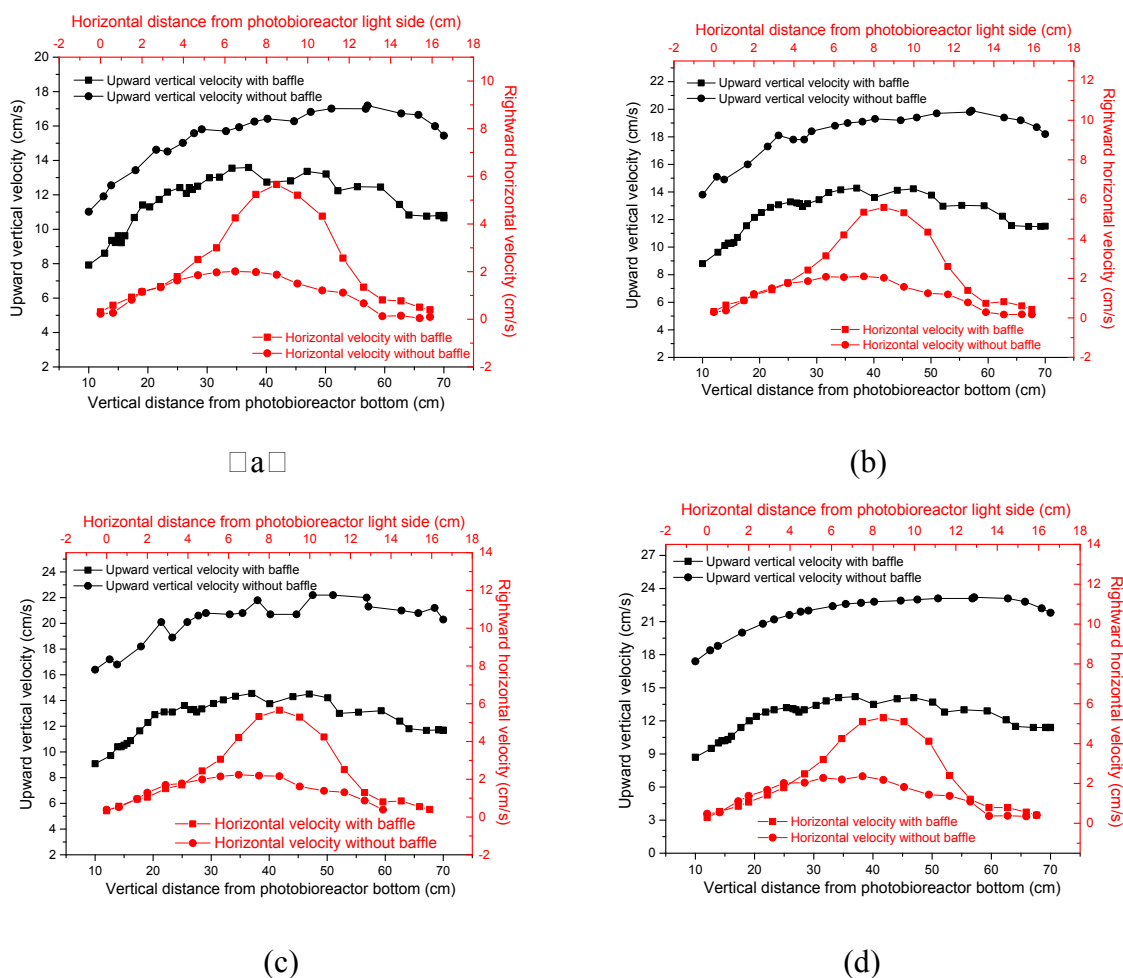

Fig.1 Vertical velocity and horizontal velocity at different position in a panel bioreactor under various gas aeration rate. (a) 0.04 vvm, (b) 0.06 vvm, (c) 0.08 vvm, (d) 0.10 vvm.
